# Supplementary material for: Dual-Specificity Phosphatase 6 Deficiency Attenuates Arterial-Injury-Induced Intimal Hyperplasia in Mice
Source: MDPI journal article supplement (doi:10.3390/ijms242417136), 2023-12-05
Supplement: s1 [file s1]

## Supplementary Materials

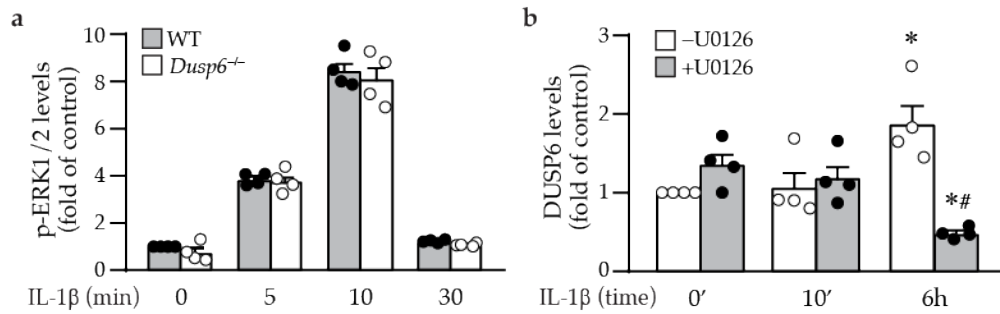

Figure S1. Quantitative analysis of IL-1 $\beta$ -induced ERK1/2 activation and DUSP6 expression in VSMCs. (a) Quantification of IL-1 $\beta$ -induced ERK1/2 phosphorylation at different time points after IL-1 $\beta$  stimulation in wild-type (WT) and *Dusp6*<sup>-/-</sup> VSMCs. n = 4 each. (b) Wild-type VSMCs were pretreated with or without U0126, an ERK1/2 inhibitor, prior to stimulation with or without IL-1 $\beta$  for the indicated time, and DUSP6 expression levels were quantified. n=4 each. \**p* < 0.05 vs. vehicle (-U0126) without IL-1 $\beta$  treatment; #*p* < 0.05 vs. vehicle after IL-1 $\beta$  treatment for 6 h. Mann-Whitney U Test.

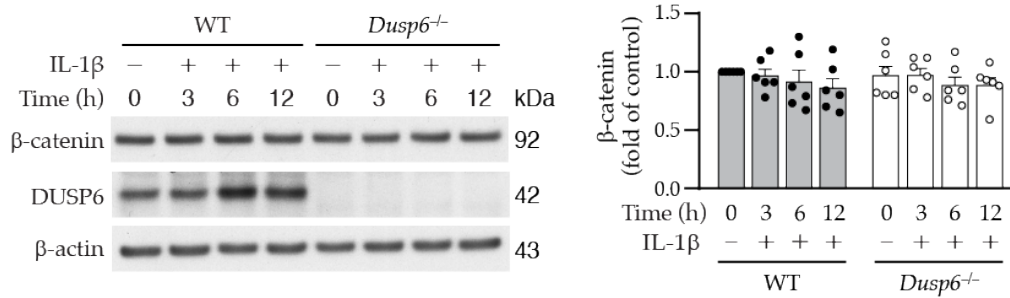

Figure S2. DUSP6 does not affect  $\beta$ -catenin levels. Serum-starved wild-type (WT) and *Dusp6*<sup>-/-</sup> VSMCs were treated with IL-1 $\beta$  (10 ng/mL) for the indicated times and proteins collected. Western blot analysis was performed to detect  $\beta$ -catenin and DUSP6 expression.  $\beta$ -Actin was used as an internal control. A representative of 6 independent experiments is shown. Levels of  $\beta$ -catenin were quantified. Expression level of WT cells at time 0 without IL-1 $\beta$  stimulation was set as 1. n=6 each. No significant difference of  $\beta$ -catenin level was detected at different time points between WT and *Dusp6*<sup>-/-</sup> VSMCs, Mann-Whitney U test.
